# Supplementary material
Source: publisher figshare collection journal article supplement (https://karger.figshare.com/ndownloader/files/18532910)
Supplement: Supplementary file 1 [file 18532910]

TABLE S1 Primers used for amplification, sequencing and expression analysis

| Fragement | Forward(5’-3’) | Reverse(5’-3’) |
| --- | --- | --- |
| ERG11 | CAACATCCACCGTTGGGAC | ATCTTAGCAGGGGCAGTTGG |
| CDR1 | TACACGAACGTGGTGCTTTG | TTCTGCCACCTGGTTAAAGG |
| CDR2 | GGTGGTAGCCCTCAAGTTGG | CCGGATGCACCCATTAAAGC |
| YPS1 | CCTCCGCCAGATTGTGGCATG | CTCGAACAGAGCCGGTTACTA |
| AWP3 | GCCCAGATCAATGGAGCGG | CACAGCGATTGACGTAACACCAG |
| EPA1 | GGGCTCAAAAA CAGCTAAAG | TAACAGTGTTTTCGTTTGAT |
| ACT1 | AGAAGTTGCTGCTTTAGTT | GACAGCTTGAATGGAAAC |

(Castaño,2005; Kaur,2007; Kraneveld, 2011; Li,2015; Gohar,2017)
